# Supplementary material for: Sequential monitoring of elemental mercury in stack gas by dielectric barrier discharge micro-plasma emission spectrometry
Source: Royal Society of Chemistry journal article supplement (doi:10.1039/c2ja30144j), 2012-01-01
Supplement: c2ja30144j.pdf [file c2ja30144j.pdf]

## Supporting Information

### **Sequential monitoring of elemental mercury in stack gas by dielectric barrier discharge micro-plasma emission spectrometry**

Zhongchen Wu<sup>a,b</sup>, Mingli Chen<sup>a\*</sup>, Lin Tao<sup>b</sup>, Duo Zhao<sup>b</sup> and Jianhua Wang<sup>a\*</sup>

a. Research Center for Analytical Sciences, College of Sciences, Northeastern University, Shenyang, 110819, China

b. School of Space Science and Physics, Shandong University at Weihai, Weihai, 264209, China

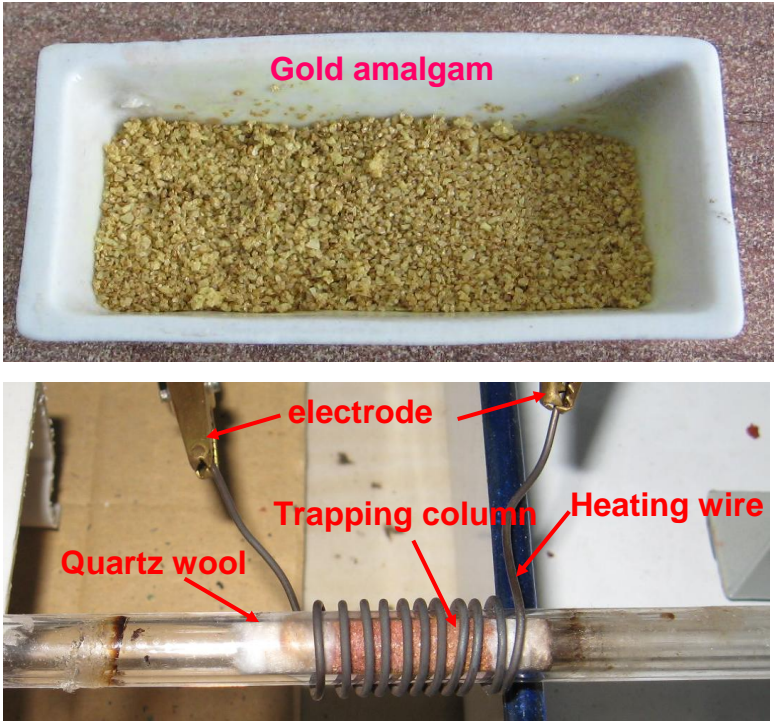

Fig. S1. Upper: the gold amalgam; Bottom: the gold amalgam trapping micro-column.

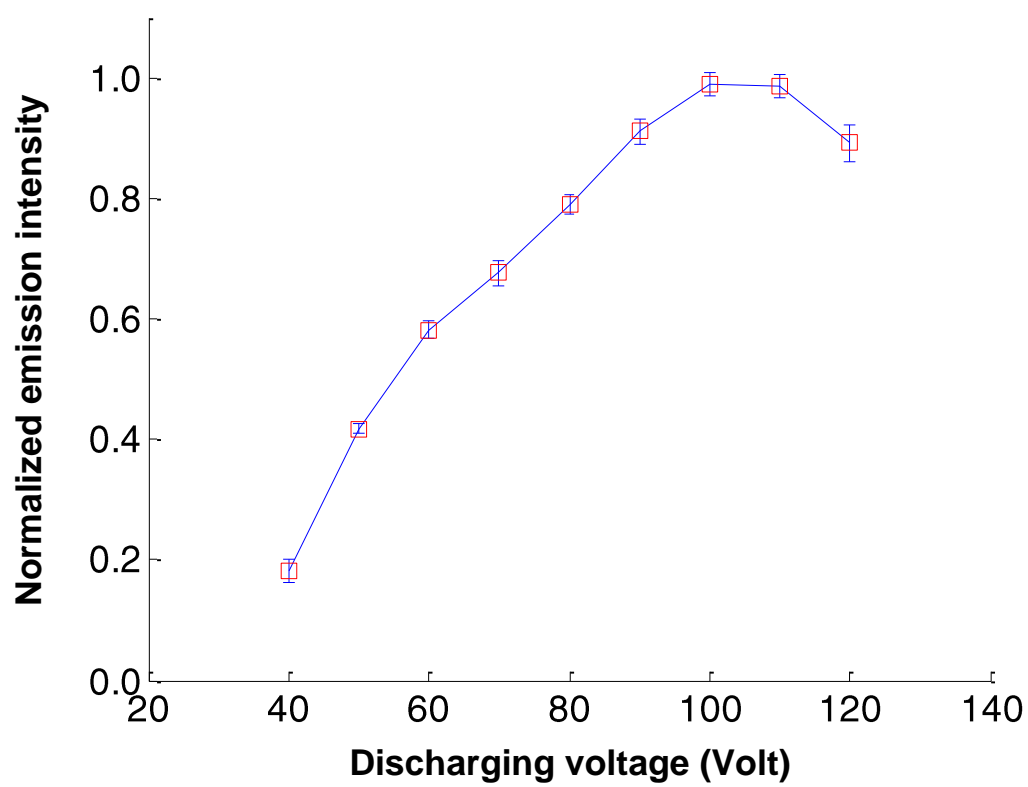

Fig. S2. The variation of normalized emission intensity at 253.7 nm with the discharging voltage. Flow rate:  $0.6 \text{ L min}^{-1}$ , discharge frequency: 43 KHz,  $\text{Hg}^0$  vapor concentration: 0.30 ppb.

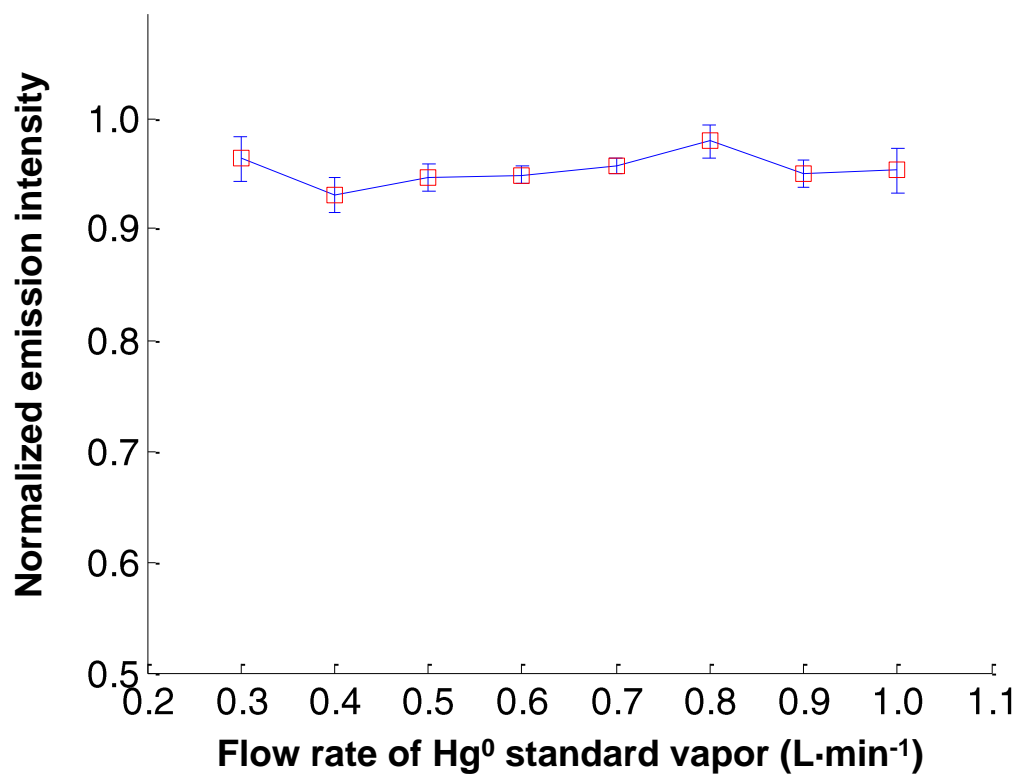

Fig. S3. The dependence of the normalized Hg<sup>0</sup> emission intensity at 253.7 nm on the flow rate of the carrier gas. The discharging voltage: 100 V; discharge frequency: 43 KHz, the concentration of Hg<sup>0</sup> in the standard vapor: 0.30 ppb.
